# Supplementary material
Source: PubMed Central journal article supplement (PMC3423535)
Supplement: NIHMS359035-supplement-Figs_S1-S5.pdf [file NIHMS359035-supplement-Figs_S1-S5.pdf]

## SUPPLEMENTARY INFORMATION:

**Figure S1:** Schematic overview of the HB-EGF and AREG lentivirus constructs used in this study. sHB-EGF and proHB-EGF denote soluble and transmembrane HB-EGF precursor, respectively.

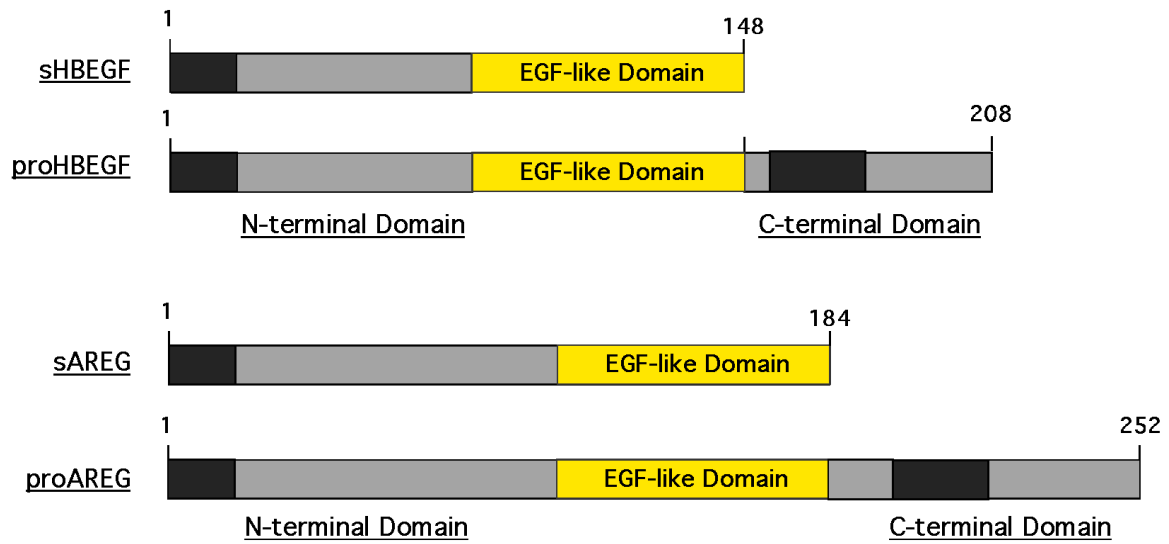

**Figure S2:** HB-EGF expression strongly changes KC morphology. N/TERT stably transduced with constitutive or inducible lentiviral constructs encoding the soluble or pro-forms of HB-EGF were cultured in KSFM as described in Material and Methods. Treatment with TET (1  $\mu\text{g/ml}$ ) was done for 24 h.

### Inducible

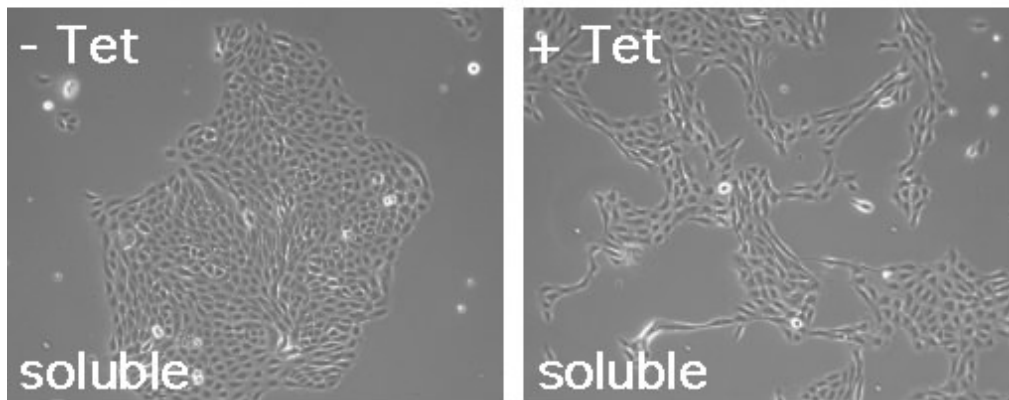

### Constitutive

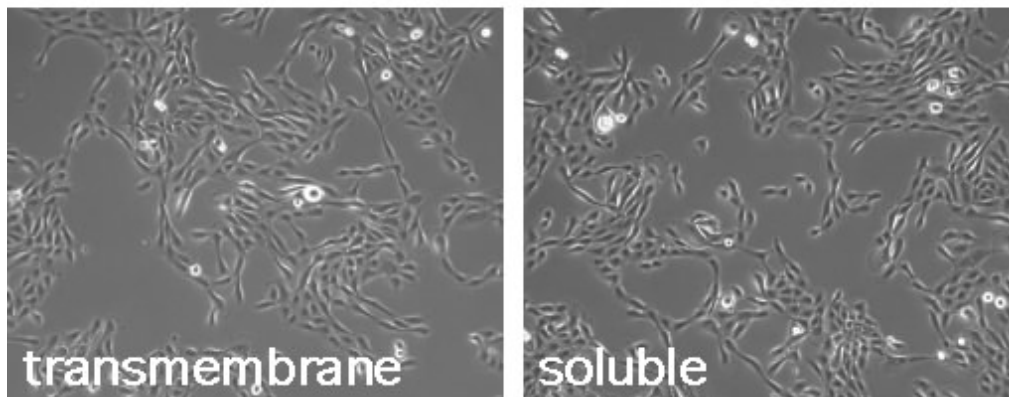

**Figure S3:** Transient infection of NHK with lentiviruses encoding sHB-EGF or sAREG.

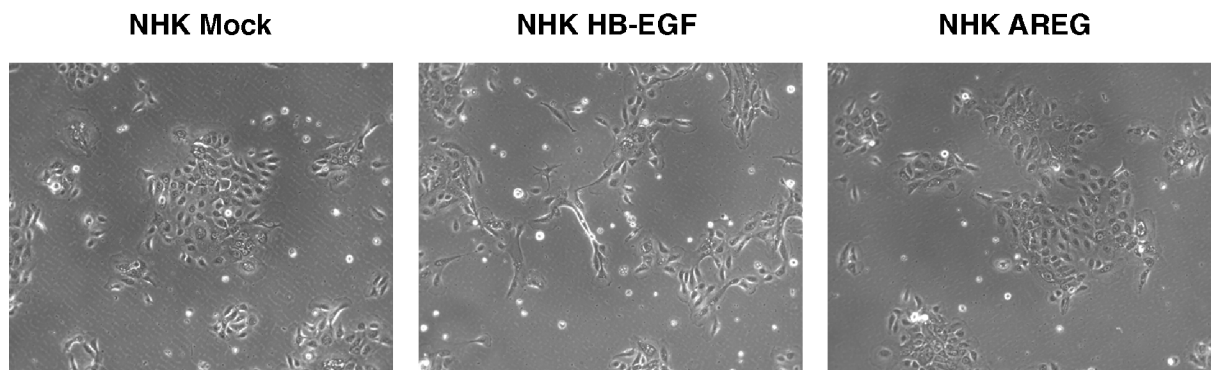

**Figure S4:** Six day growth assays with N/TERT-TR control cells incubated in the presence or absence of 1  $\mu\text{g/ml}$  TET followed by crystal violet staining.

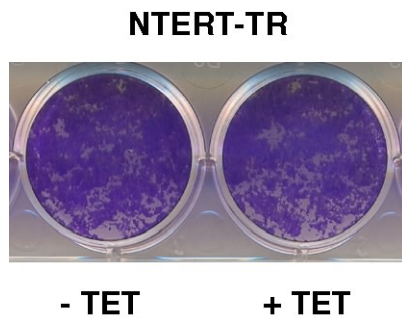

**Figure S5: AREG shedding in N/TERT with and without constitutive expression of proHB-EGF.** Subconfluent cultures of N/TERT with and without constitutive expression of proHB-EGF were incubated in the presence or absence of HB-EGF Ab (5  $\mu$ g/ml), PD158780 (1  $\mu$ M) or GM6001 (40  $\mu$ M) for 24h and the conditioned medium was analyzed for shed AREG. Data are expressed as ng of soluble AREG per ml of supernatant (mean  $\pm$  SEM, n=3). The data for N/TERT have been previously shown (Stoll *et al.*, 2010) and are included here for comparison.

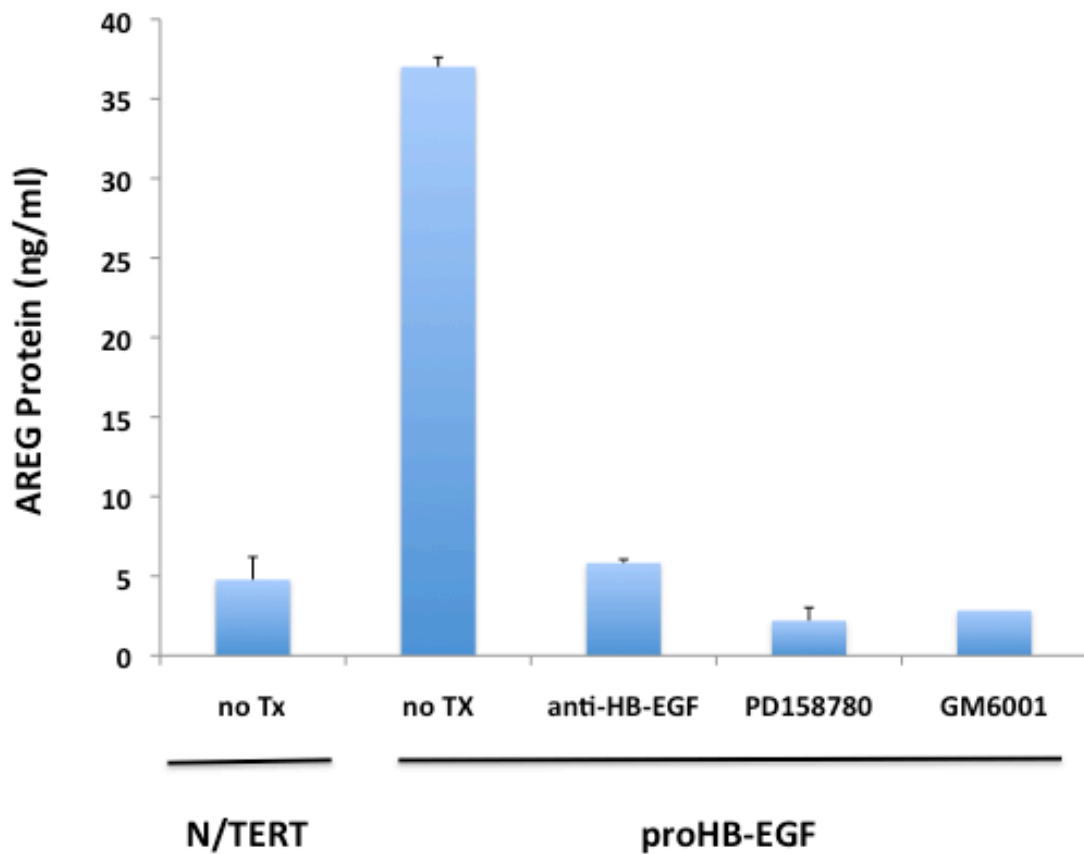

**Video 1:** N/TERT KCs

**Video 2:** N/TERT KCs with constitutive expression of AREG

**Video 3:** N/TERT KCs with constitutive expression of HB-EGF

**References:**

Stoll SW, Johnson JL, Li Y, Rittié L, Elder JT (2010) Amphiregulin carboxy-terminal domain is required for autocrine keratinocyte growth. *J Invest Dermatol* 130:2031-2040.
